# Supplementary material
Source: Research Square preprint supplement (doi:10.21203/rs.3.rs-9433625/v1)
Supplement: Supplementary file 1 [file 0c3868495c37f720beb055f7.docx]

Table S1: Number of districts across different states falling under the study area.

| State | Number of districts |
| --- | --- |
| Bihar | 38 |
| Jharkhand | 24 |
| Uttar Pradesh | 75 |
| Uttarakhand | 13 |
| West Bengal | 20 |

Table S2: Shifting pattern of heat stress across the ganga valley during 1991-2024

| **Thermal stress regime** | **Slope (days yr⁻¹)** | **Change (days decade⁻¹)** | **p-value** |
| --- | --- | --- | --- |
| Heat stress | 0.86** | 8.64** | 0.0026 |
| No thermal stress | -0.73** | -7.29** | 0.0041 |

Note: p-value **<0.01
