# Supplementary material
Source: Research Square preprint supplement (doi:10.21203/rs.3.rs-9433625/v1)
Supplement: Supplementary file 2 [file 6fd7d16f079ce6725a961276.docx]

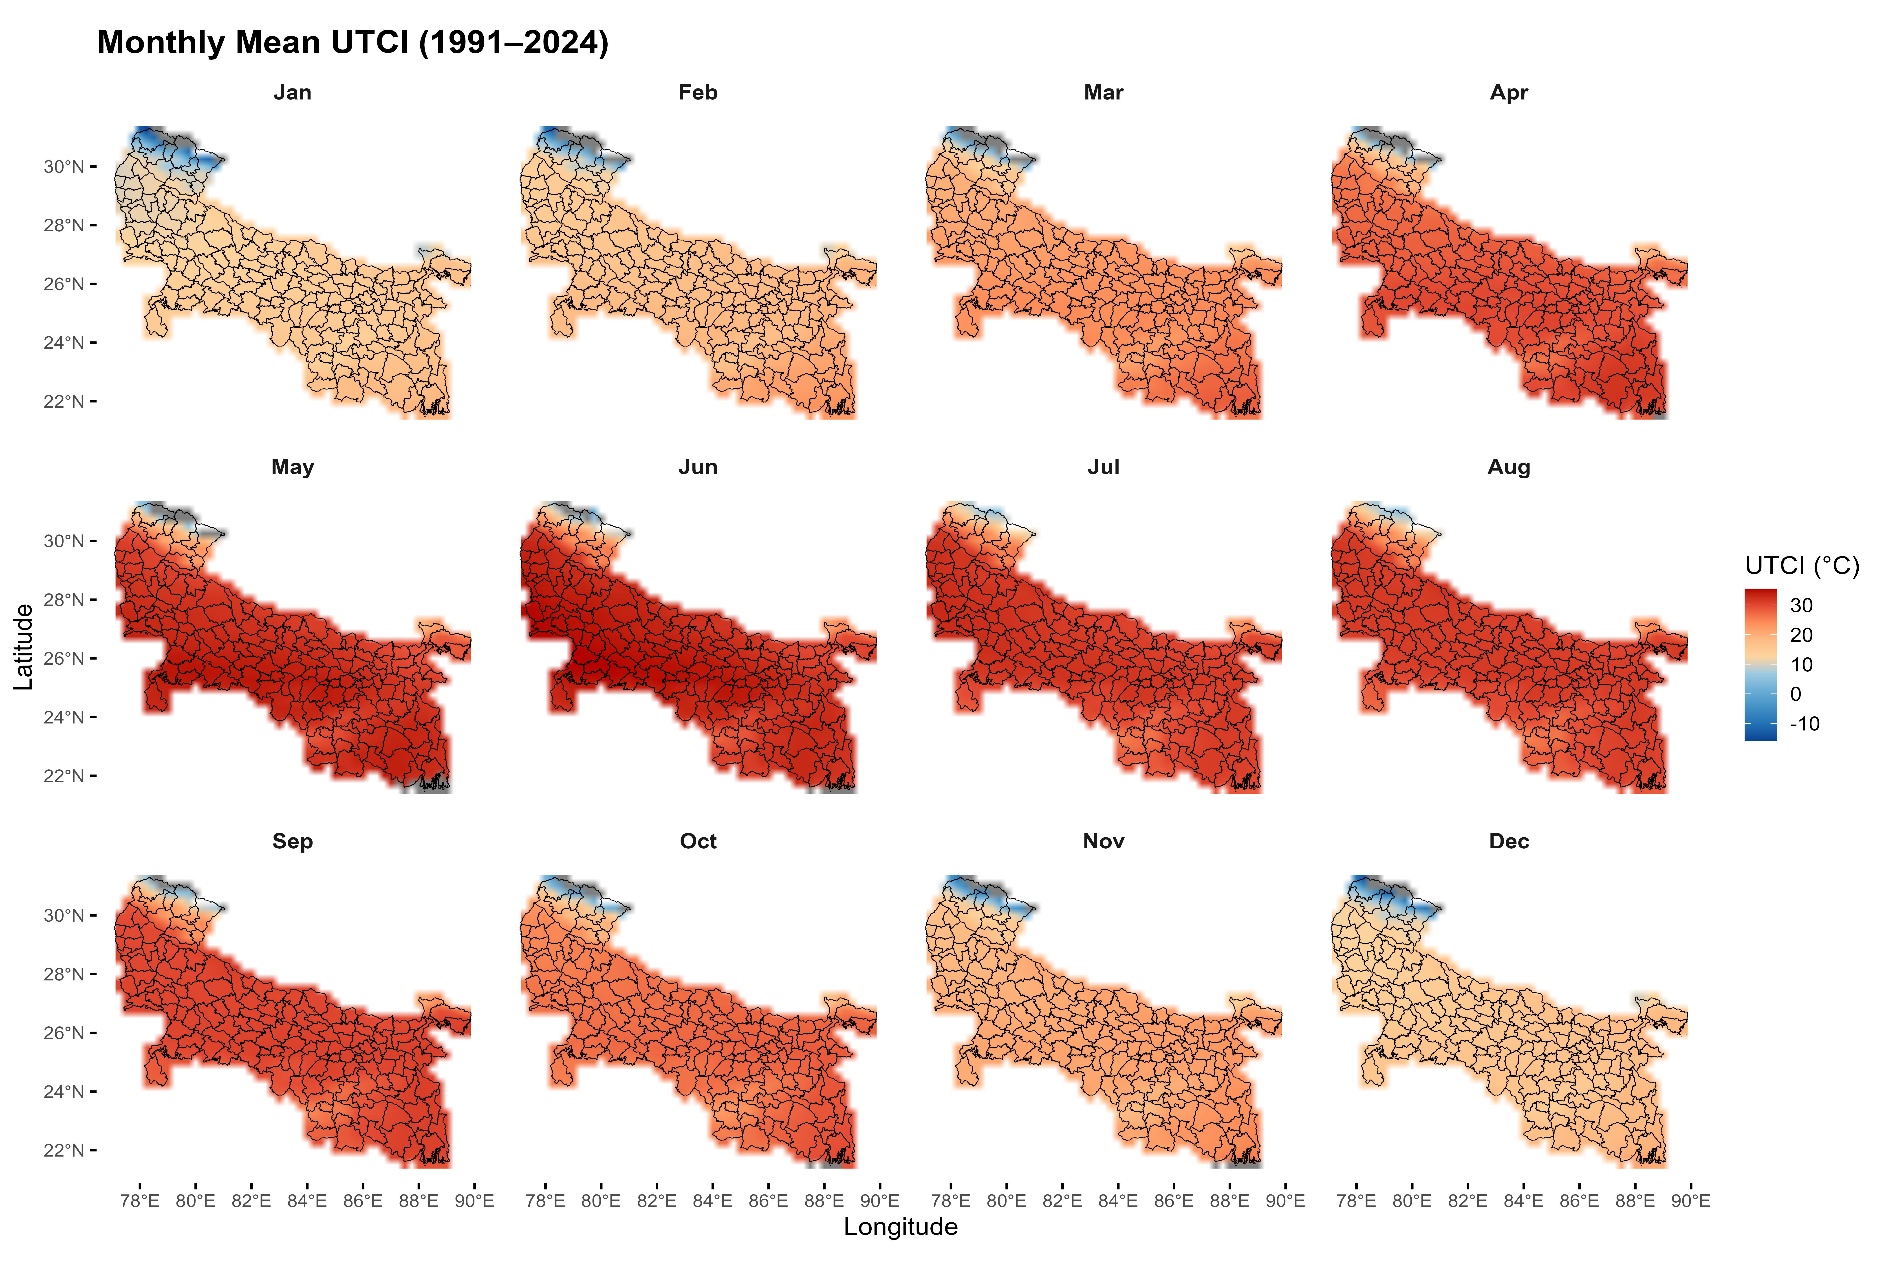


Figure S1: Spatial distribution of monthly mean UTCI across the Ganga River Valley (1991-2024)


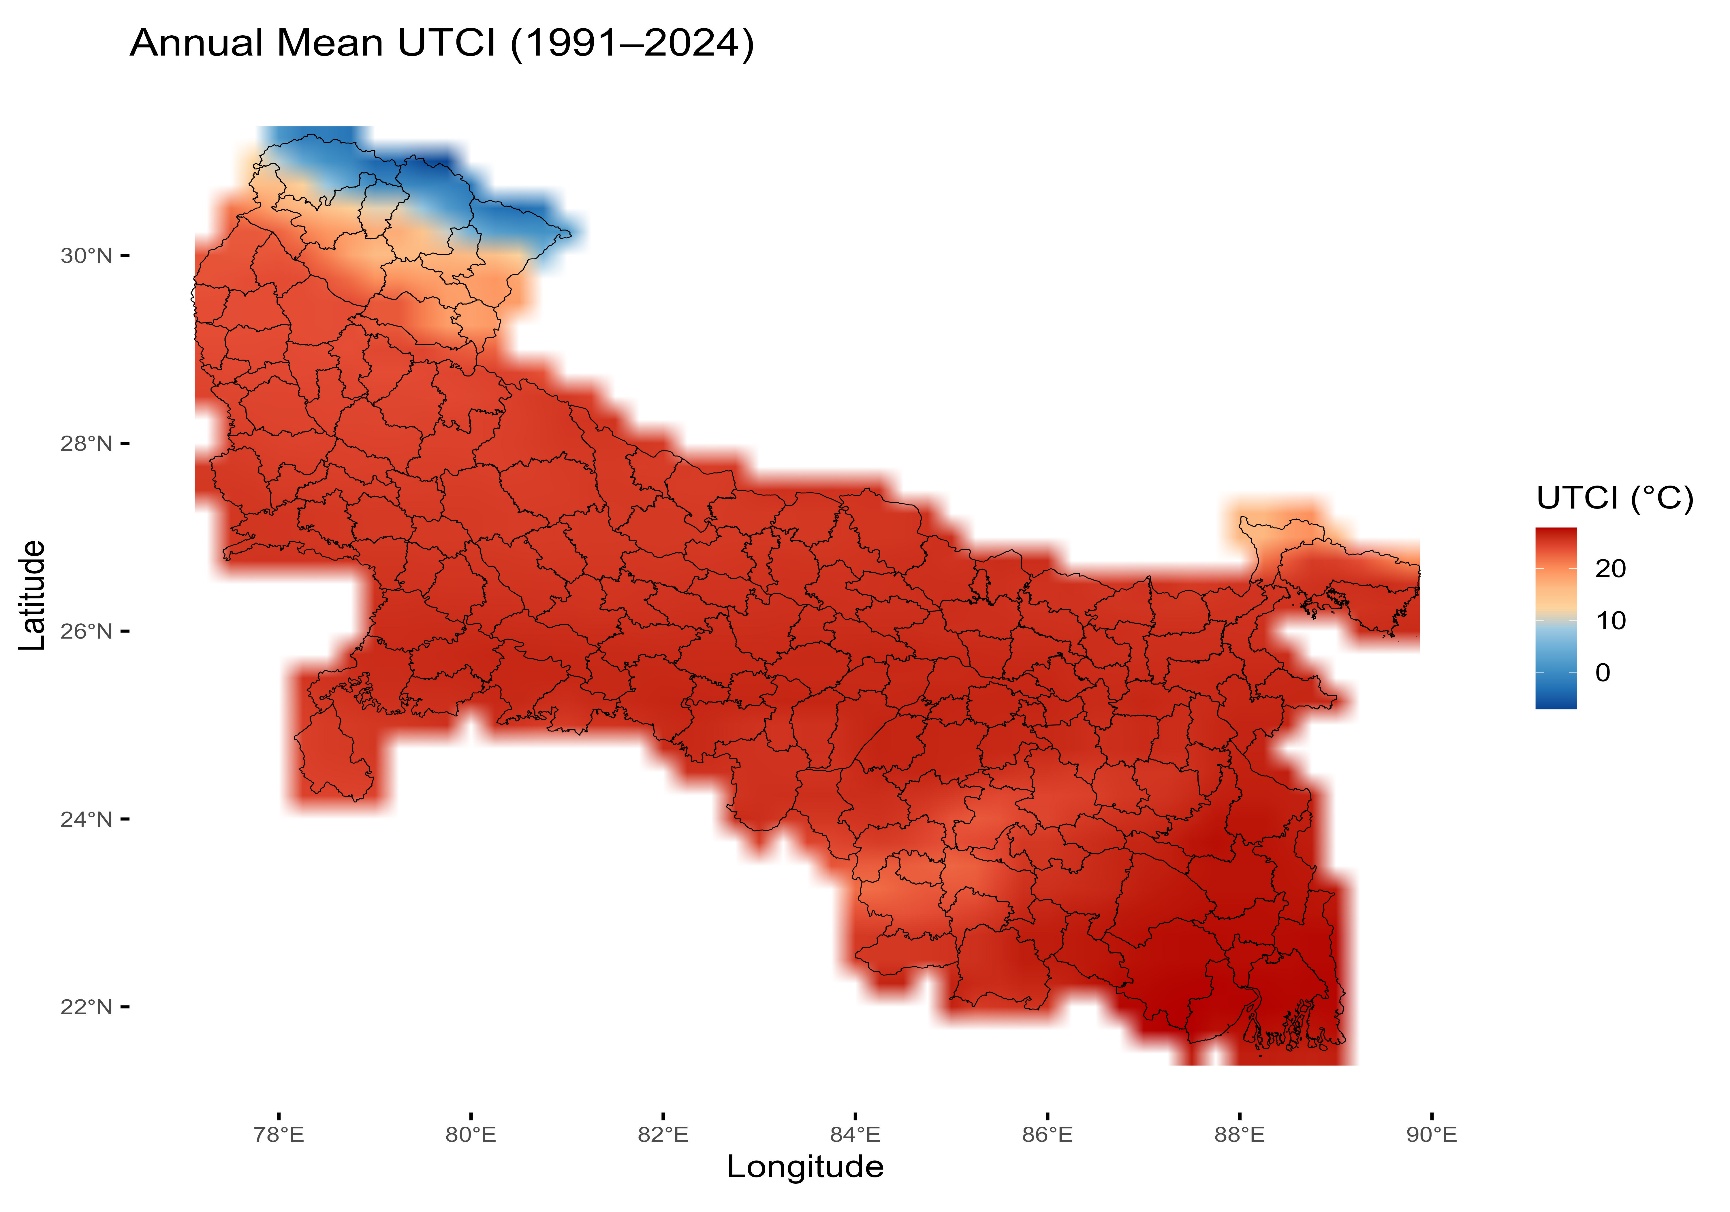


Figure S2: Spatial distribution of annual mean UTCI across the Ganga River Valley (1991-2024)


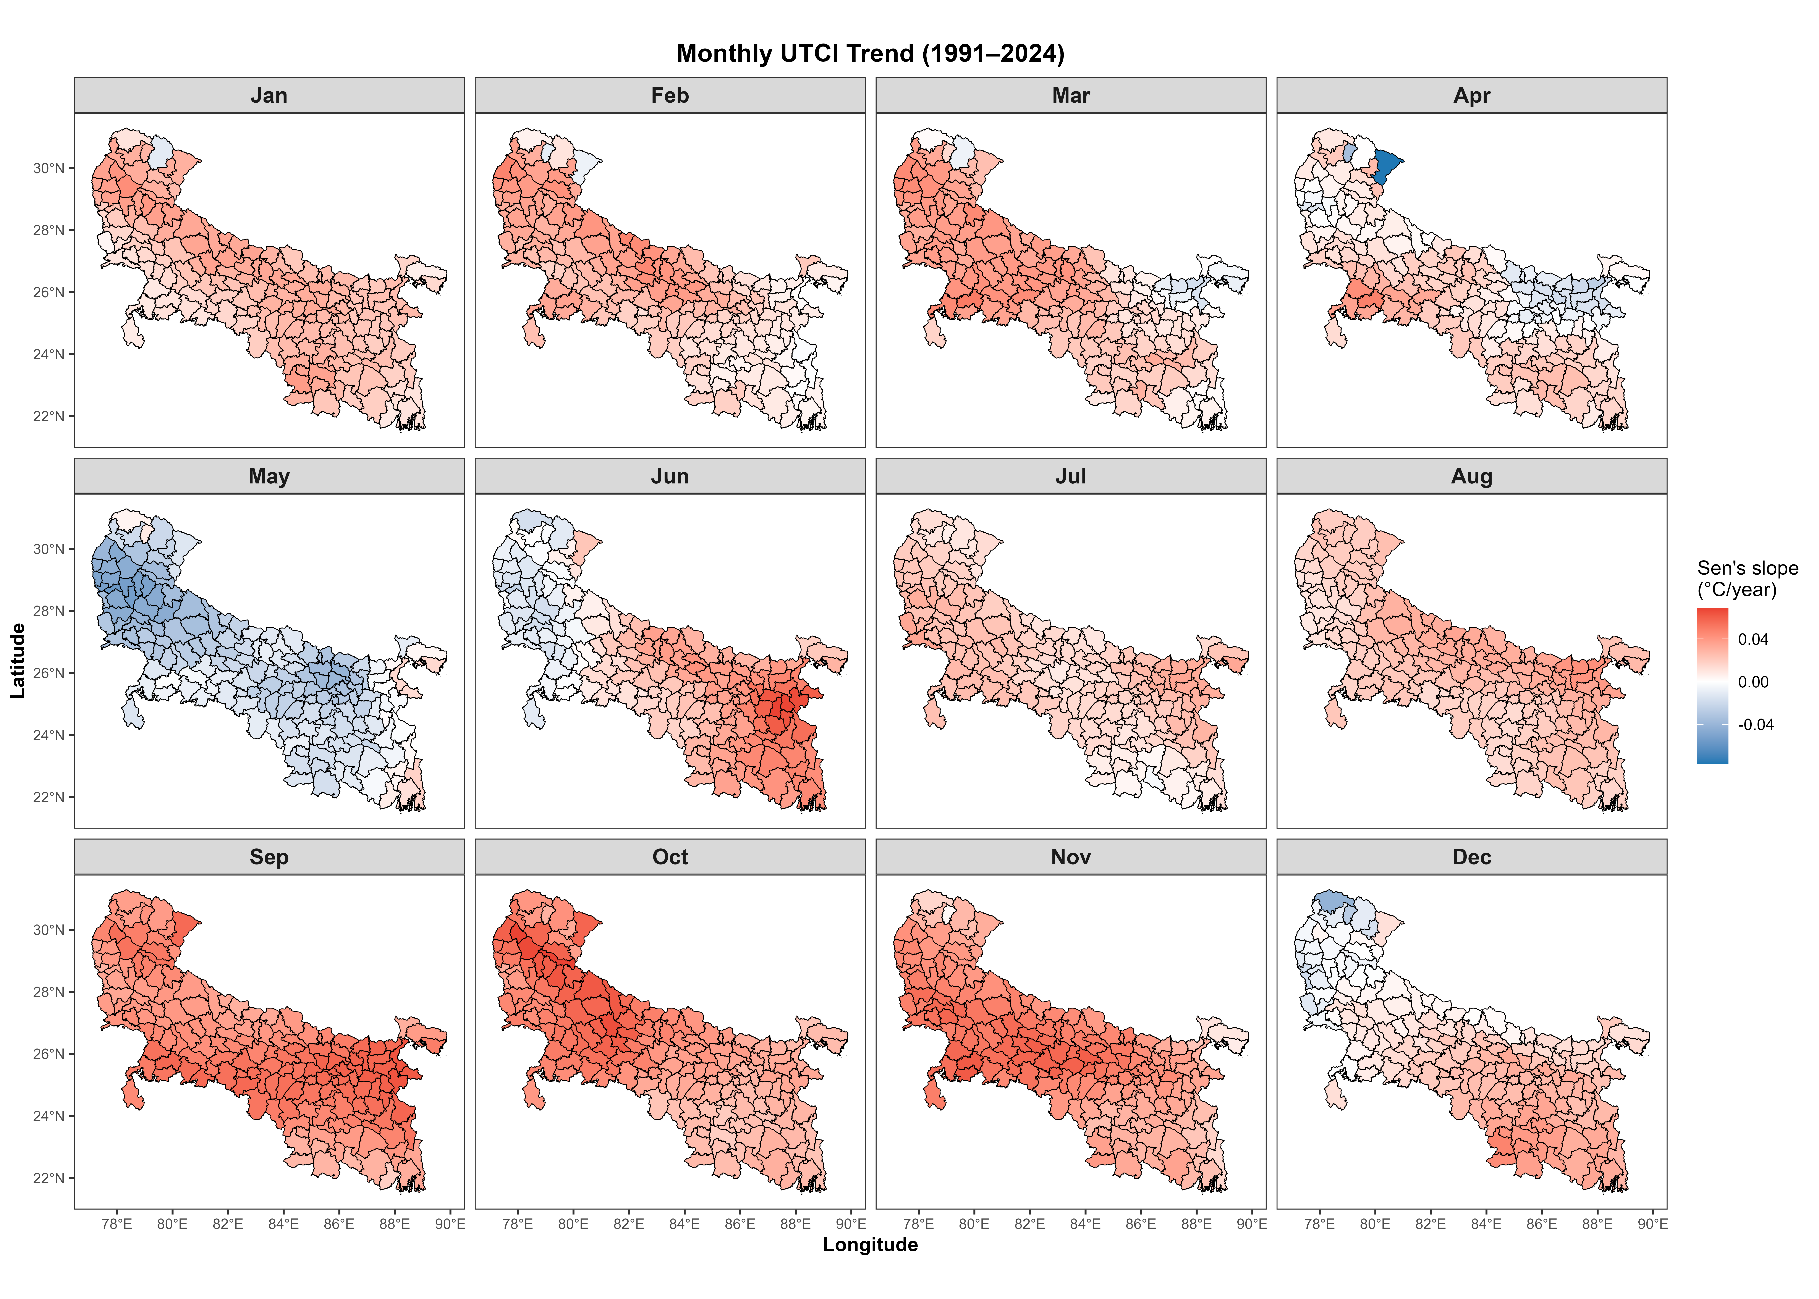


Figure S3: Trends and magnitude (Sen’s slope) of monthly UTCI across districts showing statistically significant trends at p < 0.05.
